# Supplementary material
Source: PubMed Central journal article supplement (PMC5761732)
Supplement: NIHMS851682-supplement-Supplementary_Figures_1-3.pdf [file NIHMS851682-supplement-Supplementary_Figures_1-3.pdf]

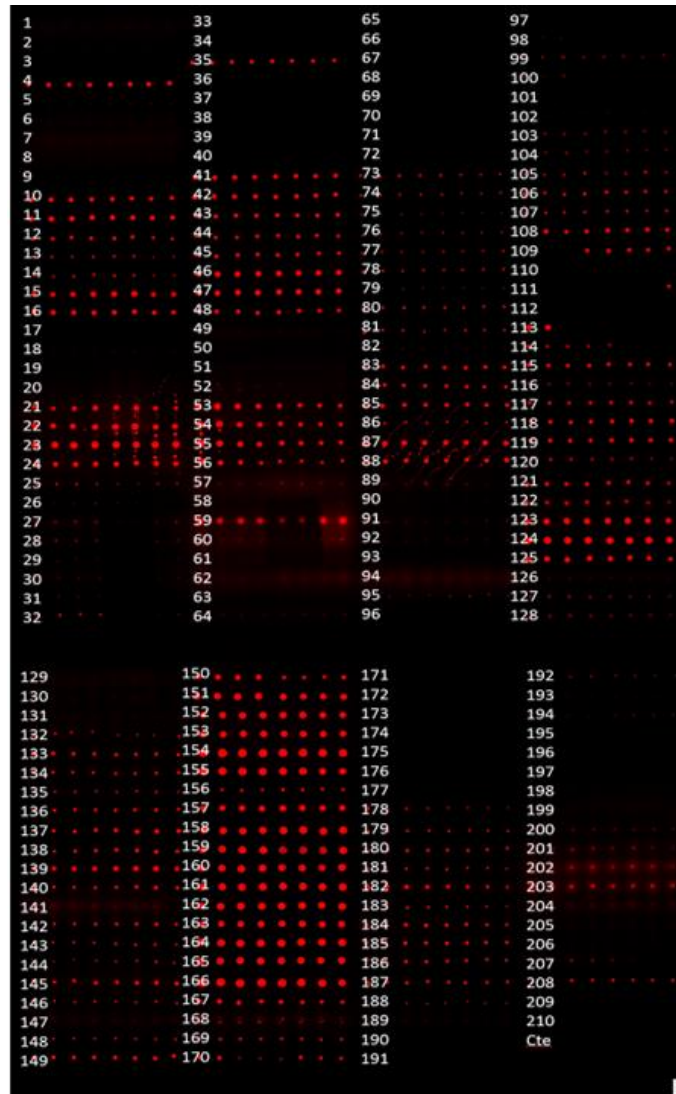

**Supplementary Figure 1.** Fluorescence micrograph of liquid lipid based components pin spotted on PDMS palette. Scale bar is 200  $\mu\text{m}$ .

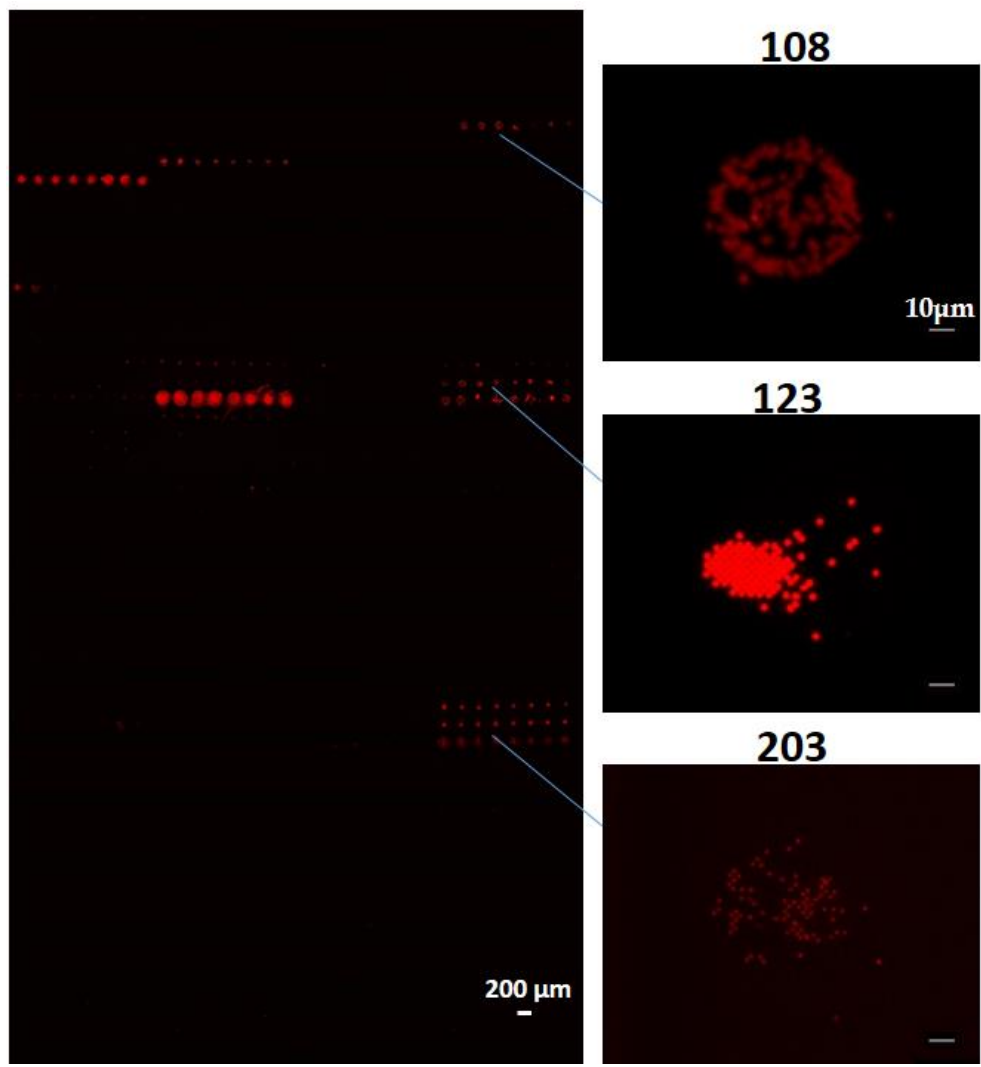

**Supplementary Figure 2.** Fluorescent micrograph of a liquid lipid based microarray printed using the nanointaglio method.

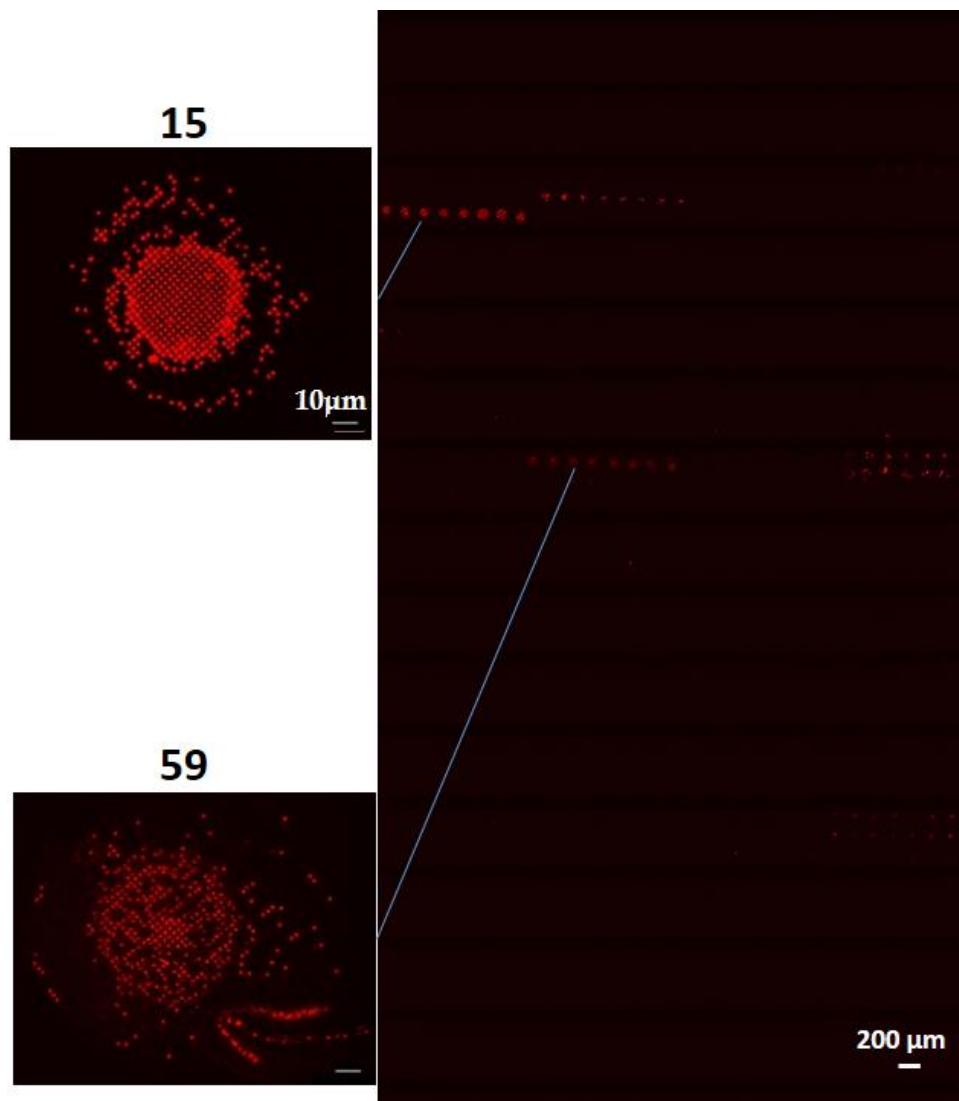

**Supplementary Figure 3.** Fluorescence micrograph of the liquid lipid based microarray 1hr after immersion under water; which shows the effect of immersion under water on samples stability.
